# Supplementary material
Source: PubMed Central journal article supplement (PMC10350825)
Supplement: EMBJ-42-e112614-s001.pdf [file EMBJ-42-e112614-s001.pdf]

## Expanded View Figures

**Figure EV1. scRNA-seq data in S2-VP10 xenografts.**

- A Heatmap showing the expression of cluster-specific genes.
- B, C UMAP plots displaying selected marker gene expression.

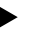



**Figure EV2. scRNA-seq data in patient PDAC.**

- A UMAP plot showing the expression levels of epithelial markers.
- B Heatmap showing the expression of cluster-specific genes.
- C Gene set enrichment analysis of six subpopulations using Metascape.
- D UMAP plot displaying the expression levels of EMT-TFs.

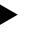

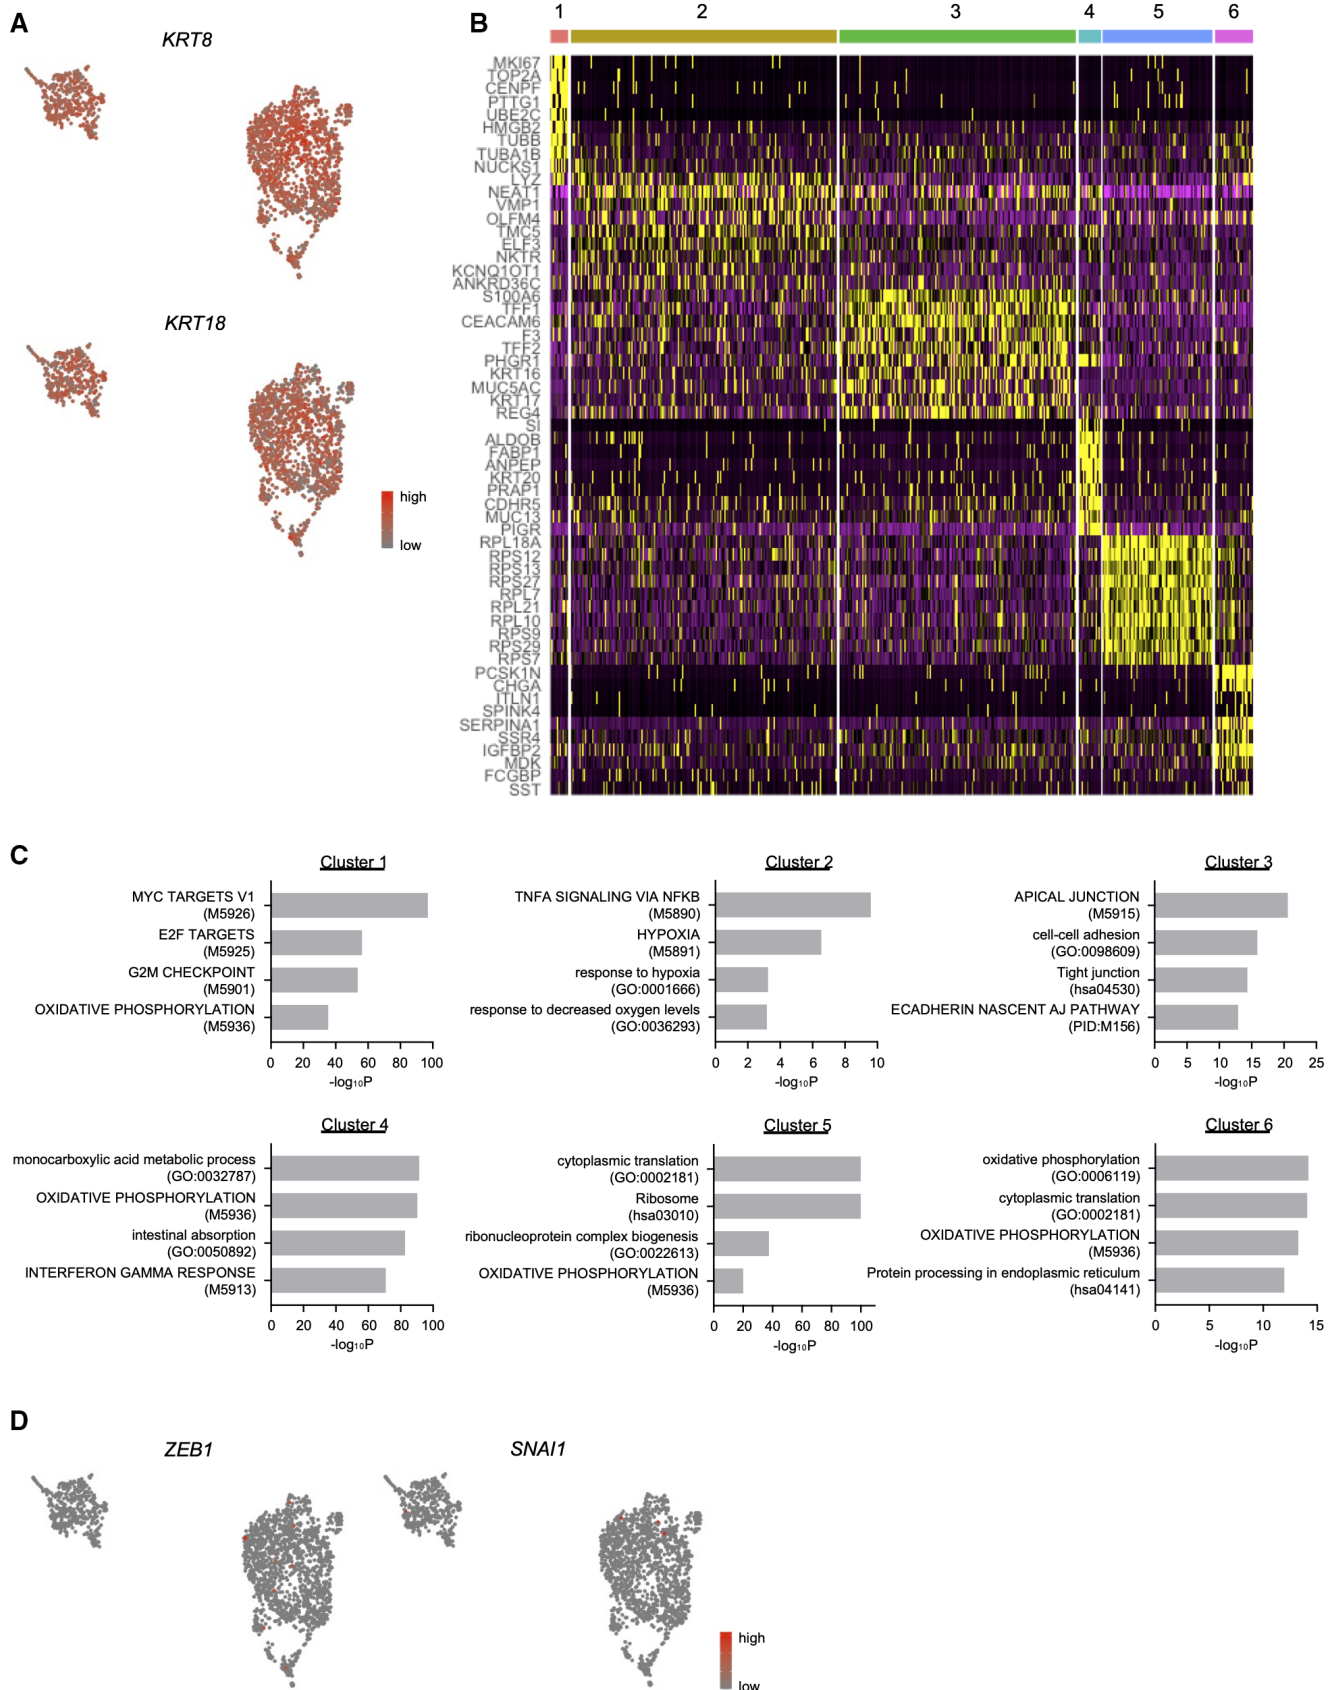

Figure EV2.

**Figure EV3. Identification of the markers for partial EMT populations in PDAC.**

- A Heatmap showing the expression of RTK genes within individual cells.
- B Dot plot displaying the expression of RTK genes in subpopulations.
- C Expression levels of classical EMT TF genes in ROR1<sup>high</sup> cells and ROR1<sup>low</sup> cells from S2-VP10 and PDO#1 xenografts ( $n = 3$ ).
- D UMAP plots displaying known CSC marker gene expression. Dotted lines indicate the ROR1<sup>high</sup> subpopulation.

Data information: Data are presented as mean  $\pm$  s.e.m., two-sided  $t$ -test. n.s., not significant.

Source data are available online for this figure.



**Figure EV4. ROR1 immunostaining in patient tumors and xenografts.**

A–C Representative images of patient PDAC (A), parental PDXs (B), and cell-derived xenografts (from S2-VP10 and S2-013) (C) stained with H&E and for ROR1. Black arrow, positive areas; white arrow, negative areas of ROR1.

D Representative images of Masson's trichrome and immunohistochemical staining for ROR1 and PanCK in patient-derived xenografts (PDX).

Data information: Scale bars, 100  $\mu\text{m}$  (A–D).

Source data are available online for this figure.

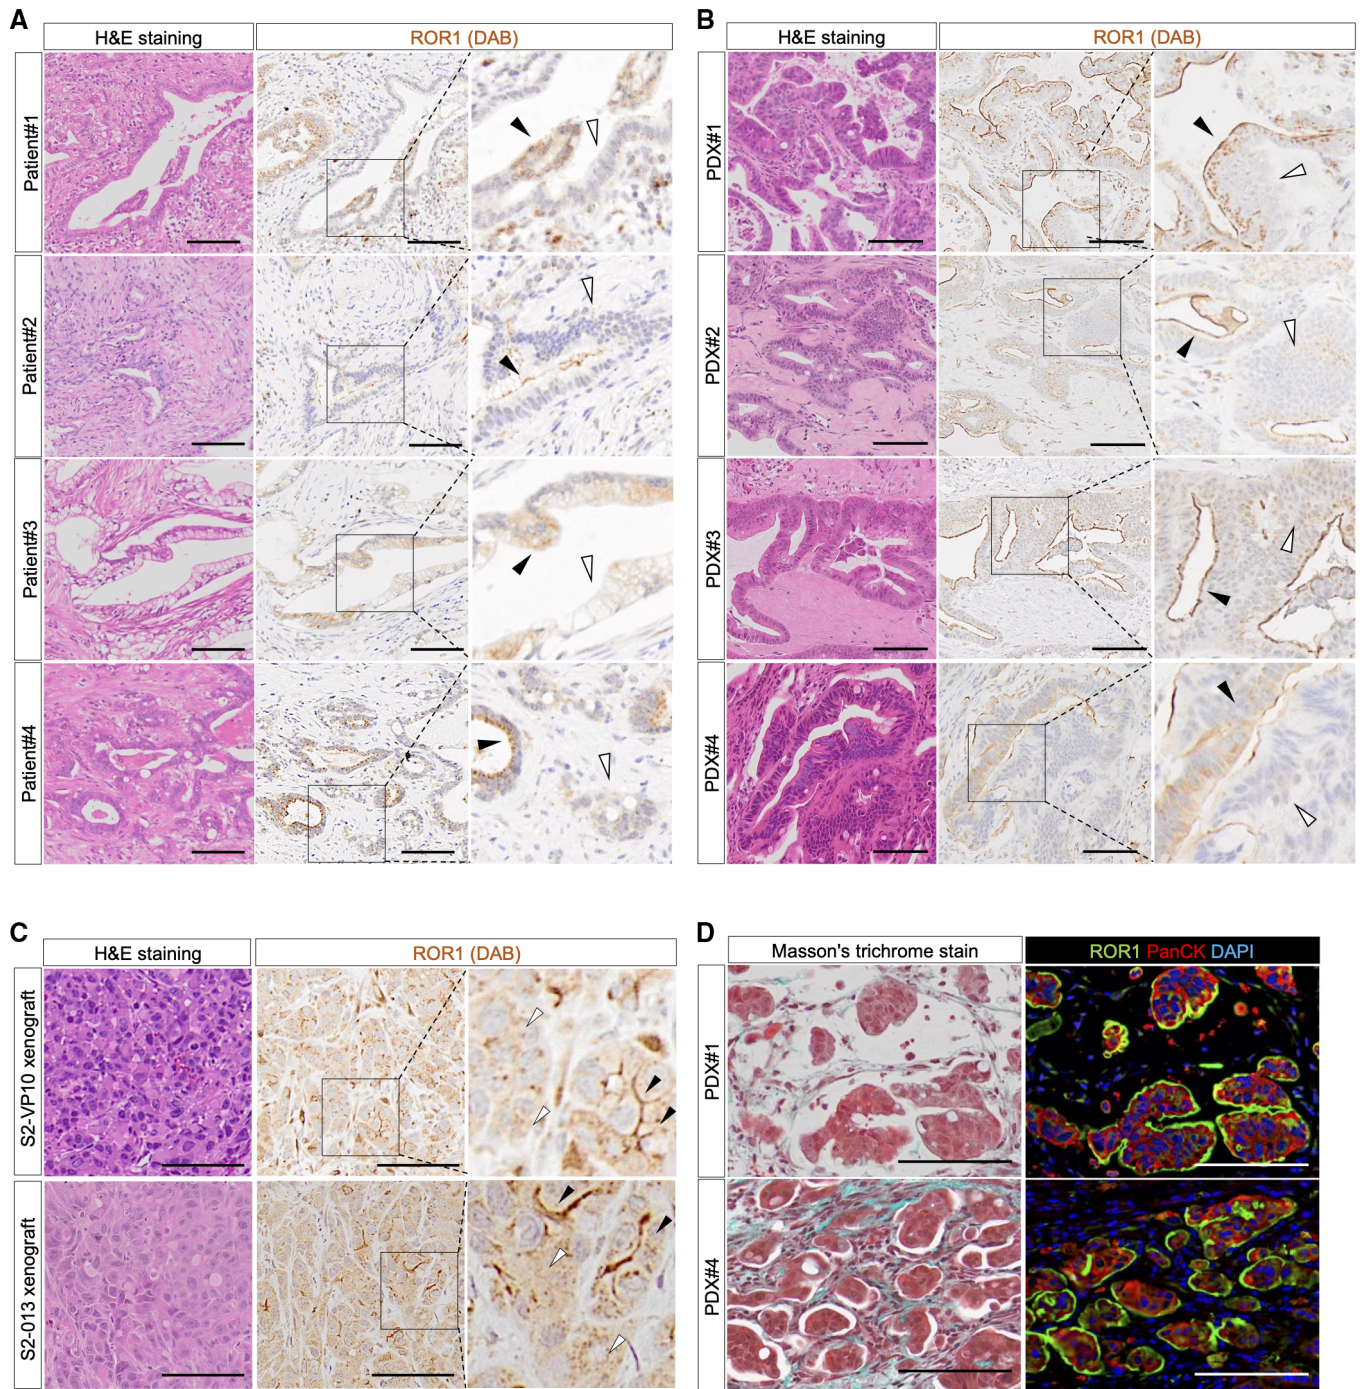

Figure EV4.



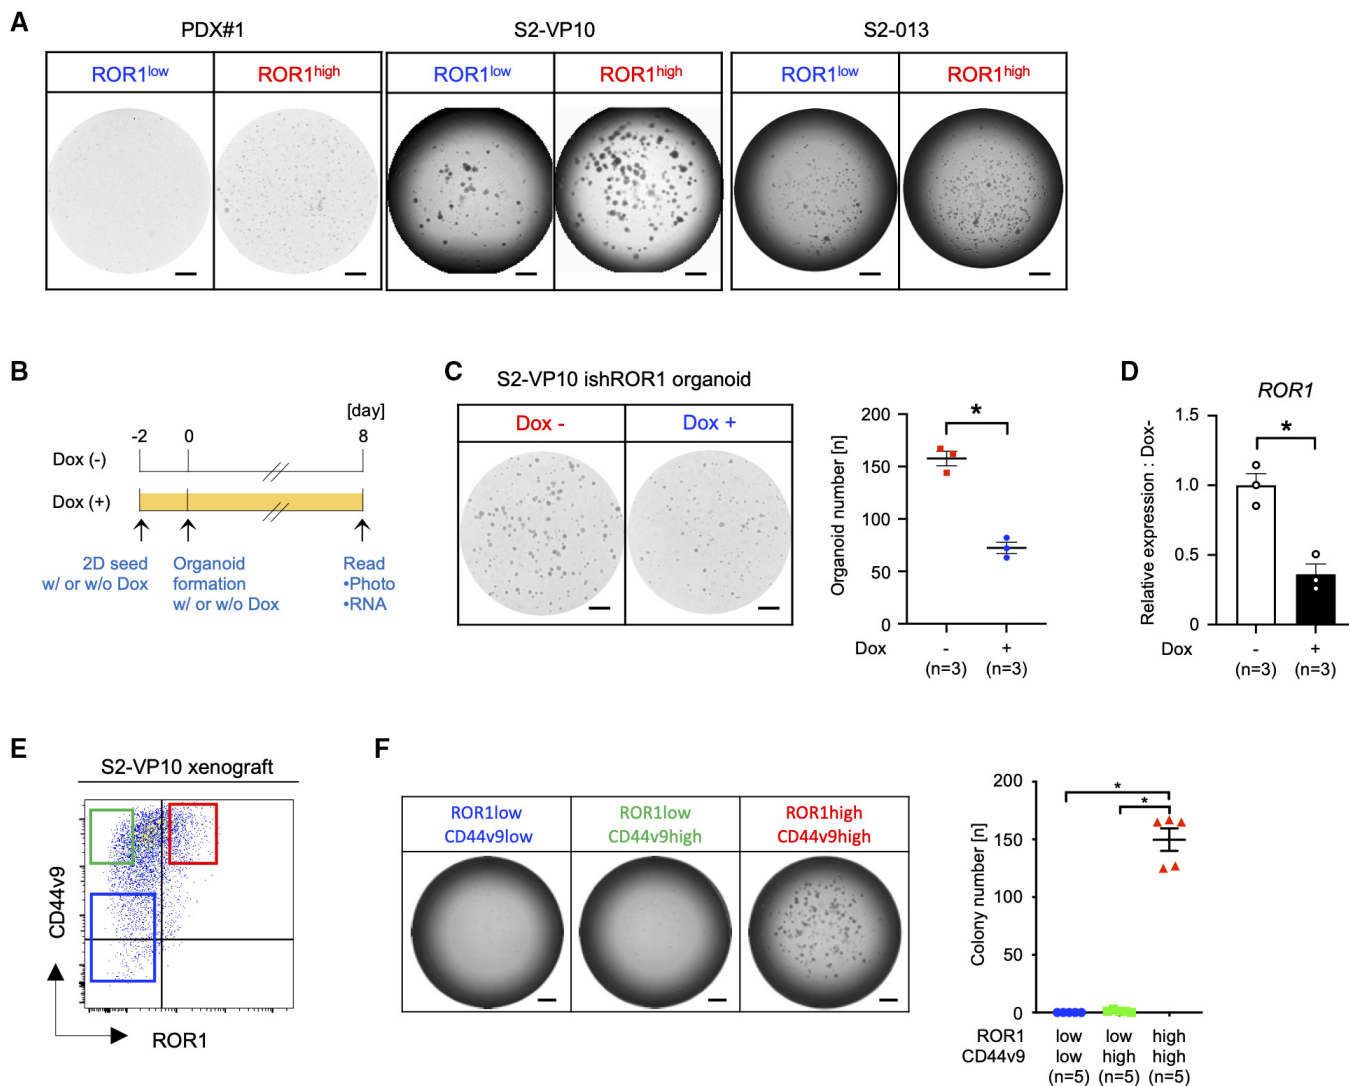

**Figure EV5. Tumorigenicity of ROR1<sup>high</sup> cells.**

- A** Representative images of organoid or colony formation assays. The ROR1<sup>high</sup> cells from PDX#1 and xenografts (S2-VP10, S2-013) efficiently formed organoids or colonies compared with ROR1<sup>low</sup> cells.
- B** Schematic diagram for the evaluation of the organoid formation activity of ROR1-knockdown cells.
- C, D** Organoid formation assay of S2-VP10 ishROR1 cells with or without Dox ( $n = 3$ , biological replicates). Representative images, the number of organoids (C), and the expression of ROR1 (D) are shown.
- E** FACS sorting of ROR1- and CD44v9-stained cells from the S2-VP10 xenograft. Red gating: ROR1<sup>high</sup>/CD44v9<sup>high</sup>, green: ROR1<sup>low</sup>/CD44v9<sup>high</sup>, blue: ROR1<sup>low</sup>/CD44v9<sup>low</sup>.
- F** Colony formation assay of ROR1<sup>high</sup>/CD44v9<sup>high</sup>, ROR1<sup>low</sup>/CD44v9<sup>high</sup>, and ROR1<sup>low</sup>/CD44v9<sup>low</sup> cells ( $n = 5$ , biological replicates). Representative images of colony formation assays and the number of colonies are shown. The ROR1<sup>high</sup>/CD44v9<sup>high</sup> cells from S2-VP10 xenografts efficiently formed colonies.

Data information: Scale bars, 1 mm (A, C, and F). Data are presented as mean  $\pm$  s.e.m., two-sided t-test. \* $P < 0.05$ .

Source data are available online for this figure.

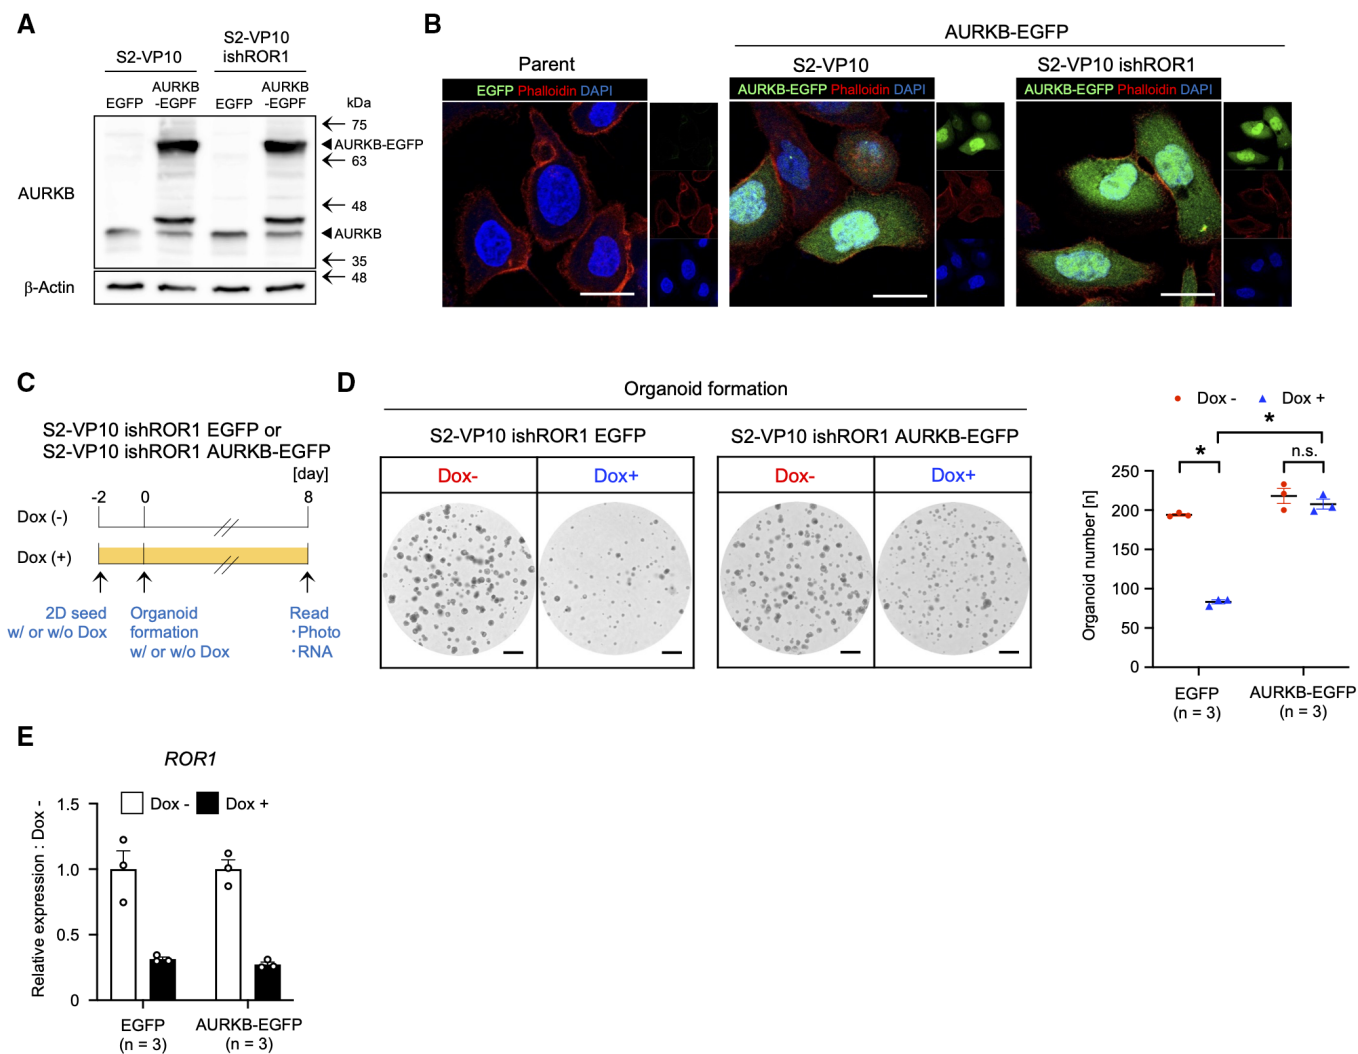

**Figure EV6. Stable expression of AURKB rescues the ROR1 knockdown in organoid formation activity.**

A Western blot analysis of AURKB. β-Actin was used as a loading control.  
 B Cellular distribution of AURKB-EGFP protein (green) evaluated by using fluorescence confocal microscopy.  
 C Schematic diagram for the evaluation of the organoid formation activity of *ROR1*-knockdown cells expressing EGFP or AURKB-EGFP.  
 D, E Organoid formation assay of S2-VP10 ishROR1 cells expressing EGFP or AURKB-EGFP ( $n = 3$ , biological replicates). Representative images, the number of organoids (D), and the expression of *ROR1* (E) are shown.

Data information: Scale bars, 20 μm (B), 1 mm (D). Data are presented as mean ± s.e.m., two-sided t-test. \* $P < 0.05$ .  
 Source data are available online for this figure.
