# Supplementary material
Source: PubMed Central journal article supplement (PMC10350825)
Supplement: EMBJ-42-e112614-s005.pdf [file EMBJ-42-e112614-s005.pdf]

**Appendix to:**

**YAP/BRD4-controlled ROR1 promotes tumor-initiating cells and hyperproliferation in pancreatic cancer**

Masaya Yamazaki, Shinjiro Hino, Shingo Usuki, Yoshihiro Miyazaki, Tatsuya Oda, Mitsuyoshi Nakao, Takaaki Ito, and Kazuya Yamagata

**Table of contents**

|                          |   |
|--------------------------|---|
| Appendix Figure S1 ..... | 2 |
| Appendix Figure S2 ..... | 3 |
| Appendix Figure S3 ..... | 4 |
| Appendix Figure S4 ..... | 5 |

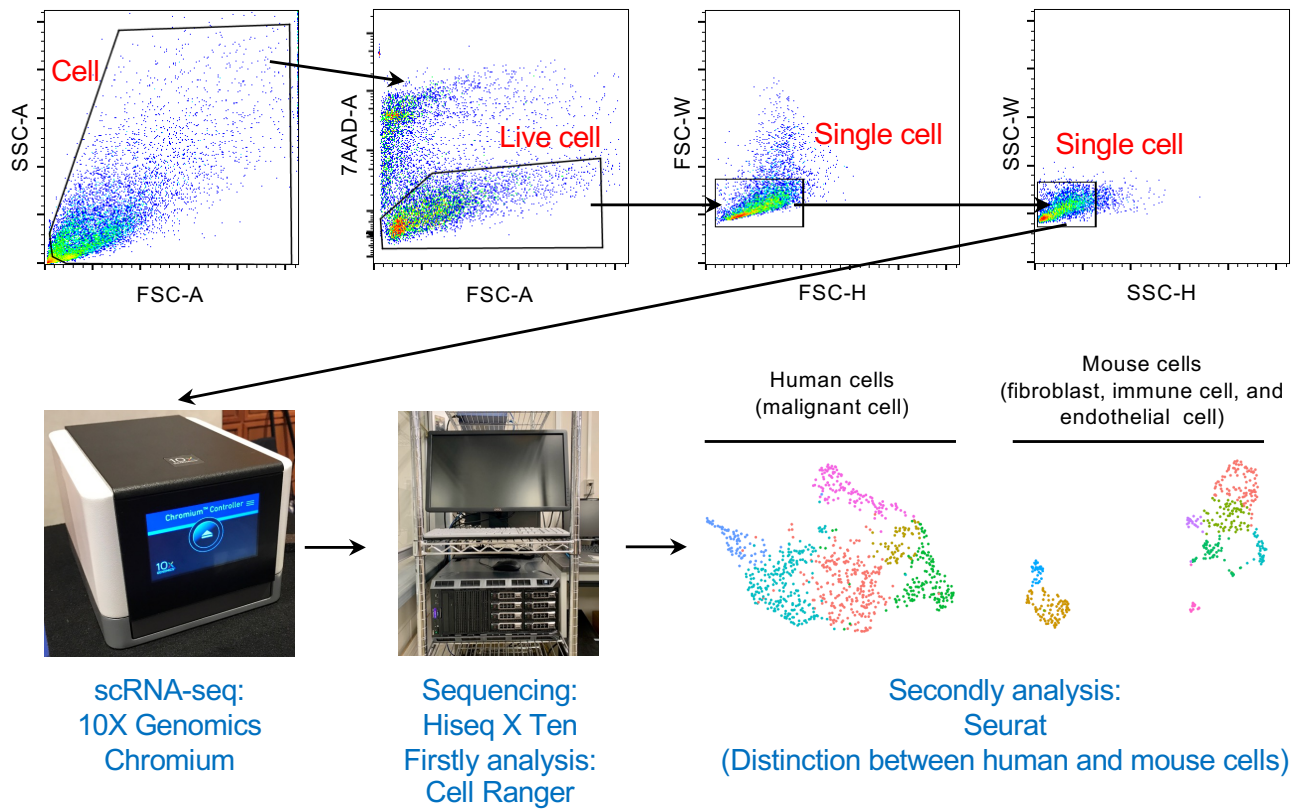

**Appendix Figure S1. Schematic diagram for the generation of single-cell RNA sequencing data.** Representative FACS plots of the S2-VP10 xenograft are shown. The sorted population did not include dead and duplicate cells. Human and mouse cells were distinguished by data analysis using Cell Ranger and Seurat.

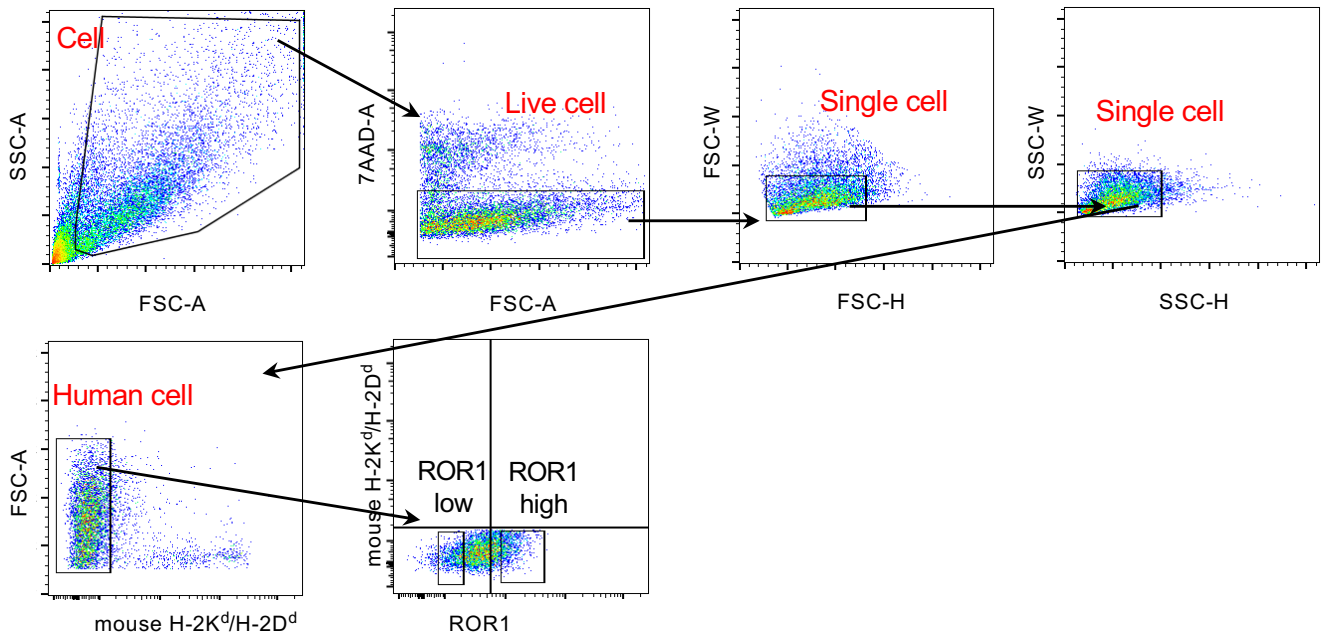

**Appendix Figure S2. Gating scheme for the isolation of ROR1<sup>high</sup> and ROR1<sup>low</sup> cells from xenografts.** The sorted population contained only single and viable human cancer cells.

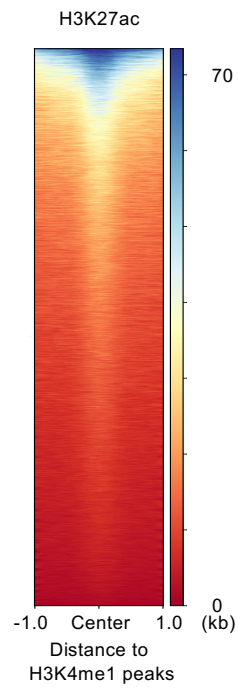

**Appendix Figure S3. Heatmap of H3K27ac CUT&RUN data on the genomic locations of the H3K4me1 peaks in S2-VP10 cells.**

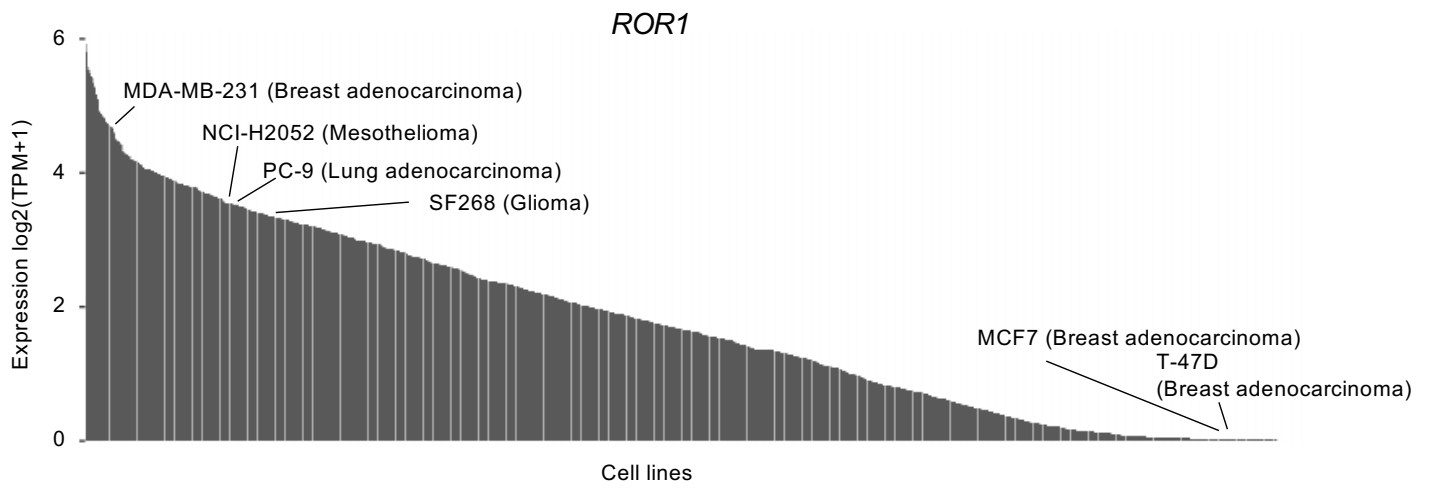

**Appendix Figure S4. Bar plot of ROR1 expression in cell lines from the CCLE database.**  
Bar plot showing ROR1 expression of 1389 cell lines.
